# Supplementary material
Source: PubMed Central journal article supplement (PMC4256768)
Supplement: 1a978515c4db9478113097261beb9d05_genetics.114.172031-10.pdf [file 1a978515c4db9478113097261beb9d05_genetics.114.172031-10.pdf]

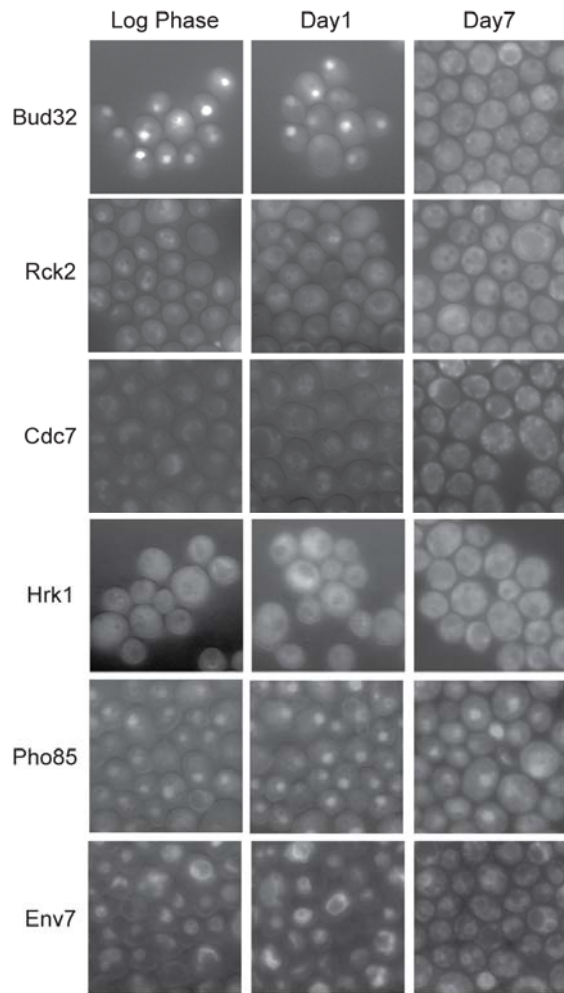

**Figure S1** Protein kinases that did not localize to cytoplasmic foci in stationary phase cells. Cells expressing the indicated protein kinase-GFP fusions were examined by fluorescence microscopy during log phase and after one or seven days of growth in rich medium. Images for six representative enzymes are shown.
