# Supplementary material
Source: PubMed Central journal article supplement (PMC4256768)
Supplement: 8d7721f423c0e04f9eff5c89c96d0871_genetics.114.172031-11.pdf [file 8d7721f423c0e04f9eff5c89c96d0871_genetics.114.172031-11.pdf]

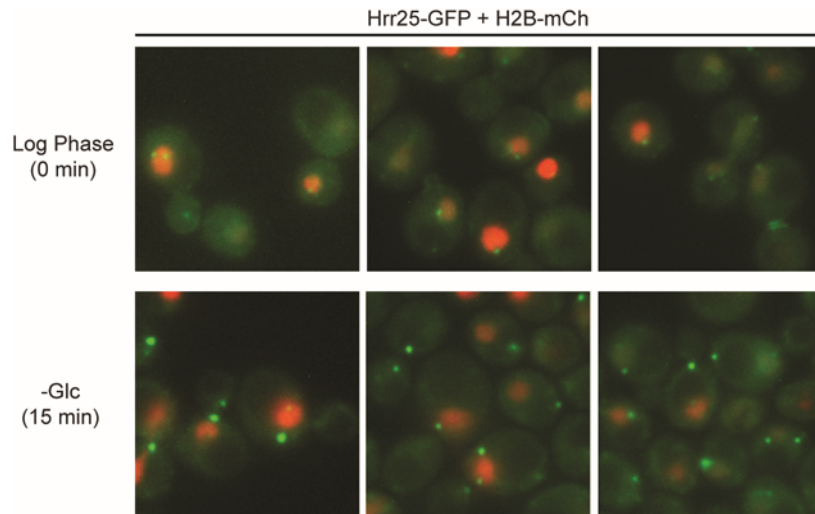

**Figure S8** Hrr25 recruitment to P-bodies following an acute starvation for glucose. Cells expressing the Hrr25-GFP and histone H2B-mCh fusion proteins were grown to log phase and then transferred for 15 min to a medium that lacks glucose. Three representative fluorescence microscopy images of cells before (0 min) and after the glucose starvation (15 min) are shown. The histone H2B reporter is a marker for the nucleus. Note that the Hrr25-GFP foci that form after the glucose starvation do not co-localize with the H2B-mCh reporter. In this experiment, 56% of the cells contained a cytoplasmic Hrr25 focus after the 15 min glucose starvation.
