# Supplementary material
Source: PubMed Central journal article supplement (PMC4256768)
Supplement: 11af24d3281c85146d5375c964abae58_genetics.114.172031-6.pdf [file 11af24d3281c85146d5375c964abae58_genetics.114.172031-6.pdf]

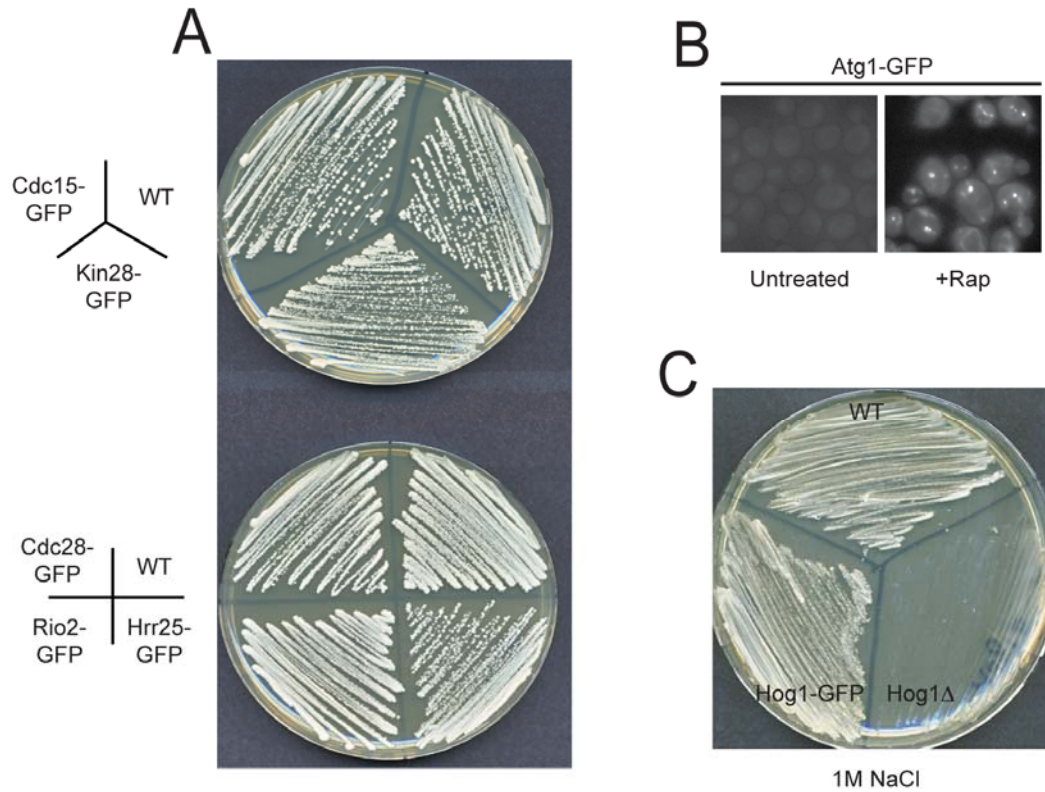

**Figure S3** The protein kinase fusions appeared to retain the normal functions of the endogenous proteins. A) The relative growth rates of cells containing GFP fusions to six essential protein kinases are shown with a plate assay. The indicated strains were plated to YPAD, incubated for 2-3 days at 30°C and then photographed. B) Cells expressing the Atg1-GFP fusion protein were examined by fluorescence microscopy before (Untreated) and after a 2 hr exposure to rapamycin (+Rap). This treatment induces macroautophagy and leads to Atg1 recruitment to the PAS. The formation of the observed foci is an indication that the Atg1-GFP fusion protein is functional. C) The presence of the Hog1-GFP fusion allowed cells to grow on medium containing 1M NaCl. Strains expressing the indicated Hog1 proteins were plated to medium containing 1M NaCl and incubated for 3-4 days at 30°C.
