# Supplementary material
Source: PubMed Central journal article supplement (PMC4256768)
Supplement: 433cc3cc5ff5ed88216e83601c2f724d_genetics.114.172031-9.pdf [file 433cc3cc5ff5ed88216e83601c2f724d_genetics.114.172031-9.pdf]

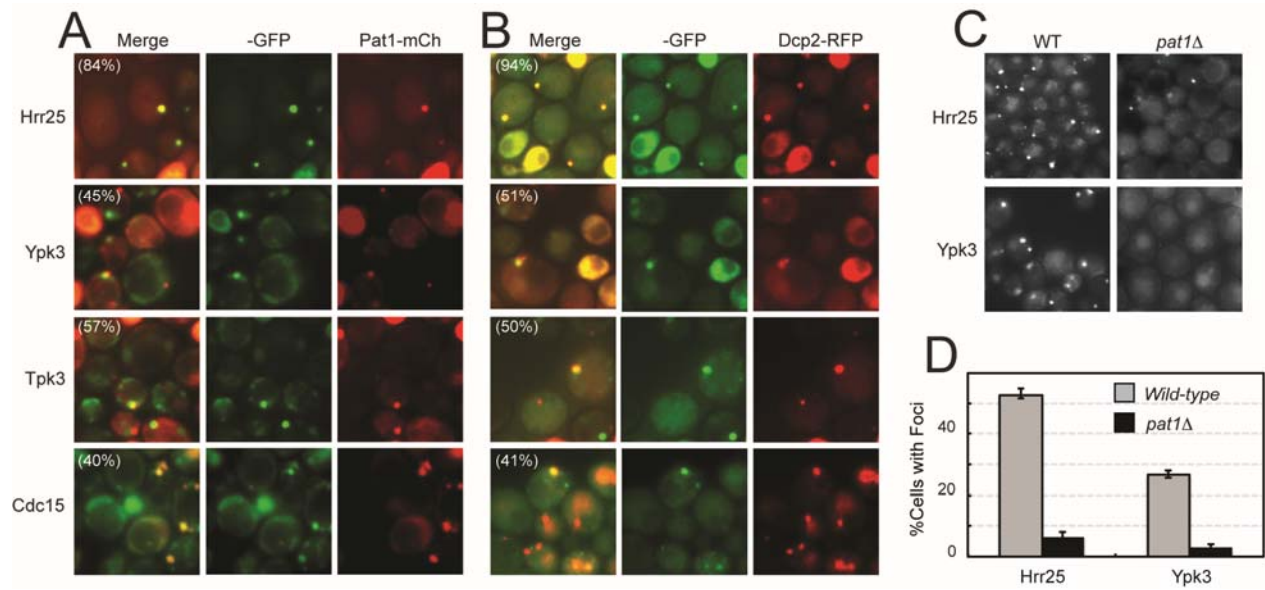

**Figure S5** Protein kinases associated with P-bodies. A, B) The co-localization of the four GFP-tagged protein kinases, Hrr25, Ypk3, Tpk3 and Cdc15, with two additional reporters for P-bodies, Pat1-mCh (A) and Dcp2-RFP (B), is shown. C, D) The numbers of protein kinase foci were diminished in cells lacking the Pat1 protein. Stationary phase wild-type and *pat1Δ* cells expressing the indicated protein kinase-GFP fusions were examined by fluorescence microscopy. The values shown for the graph in panel D represent the average of at least two independent experiments (n=100).
