# Supplementary material
Source: PubMed Central journal article supplement (PMC4256768)
Supplement: 45347bd2561b4581cbacebc140971f2e_genetics.114.172031-8.pdf [file 45347bd2561b4581cbacebc140971f2e_genetics.114.172031-8.pdf]

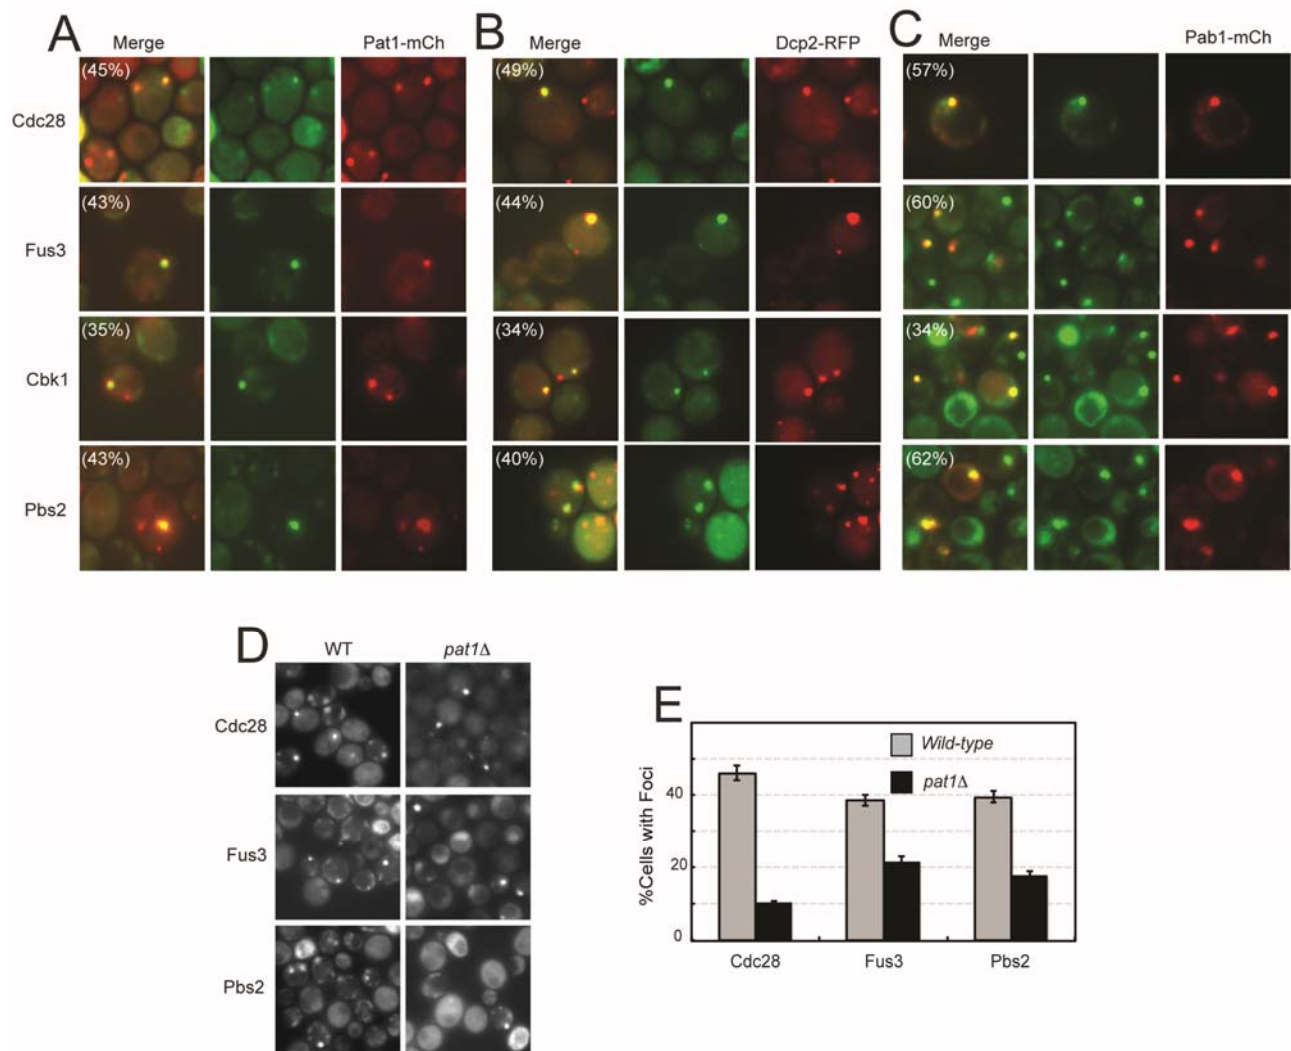

**Figure S6** Protein kinases associated with both P-bodies and stress granules in stationary phase cells. A-C) The co-localization of the four GFP-tagged protein kinases, Cdc28, Fus3, Cbk1 and Pbs2, with reporters for either P-bodies (A, Pat1-mCh; B, Dcp2-RFP) or stress granules (C, Pab1-mCh) is shown. D, E) The frequency of protein kinase foci formation was diminished in *pat1Δ* cells.
