# Supplementary material
Source: PubMed Central journal article supplement (PMC4256768)
Supplement: acc0548b522d67ba7973babef394c274_genetics.114.172031-2.pdf [file acc0548b522d67ba7973babef394c274_genetics.114.172031-2.pdf]

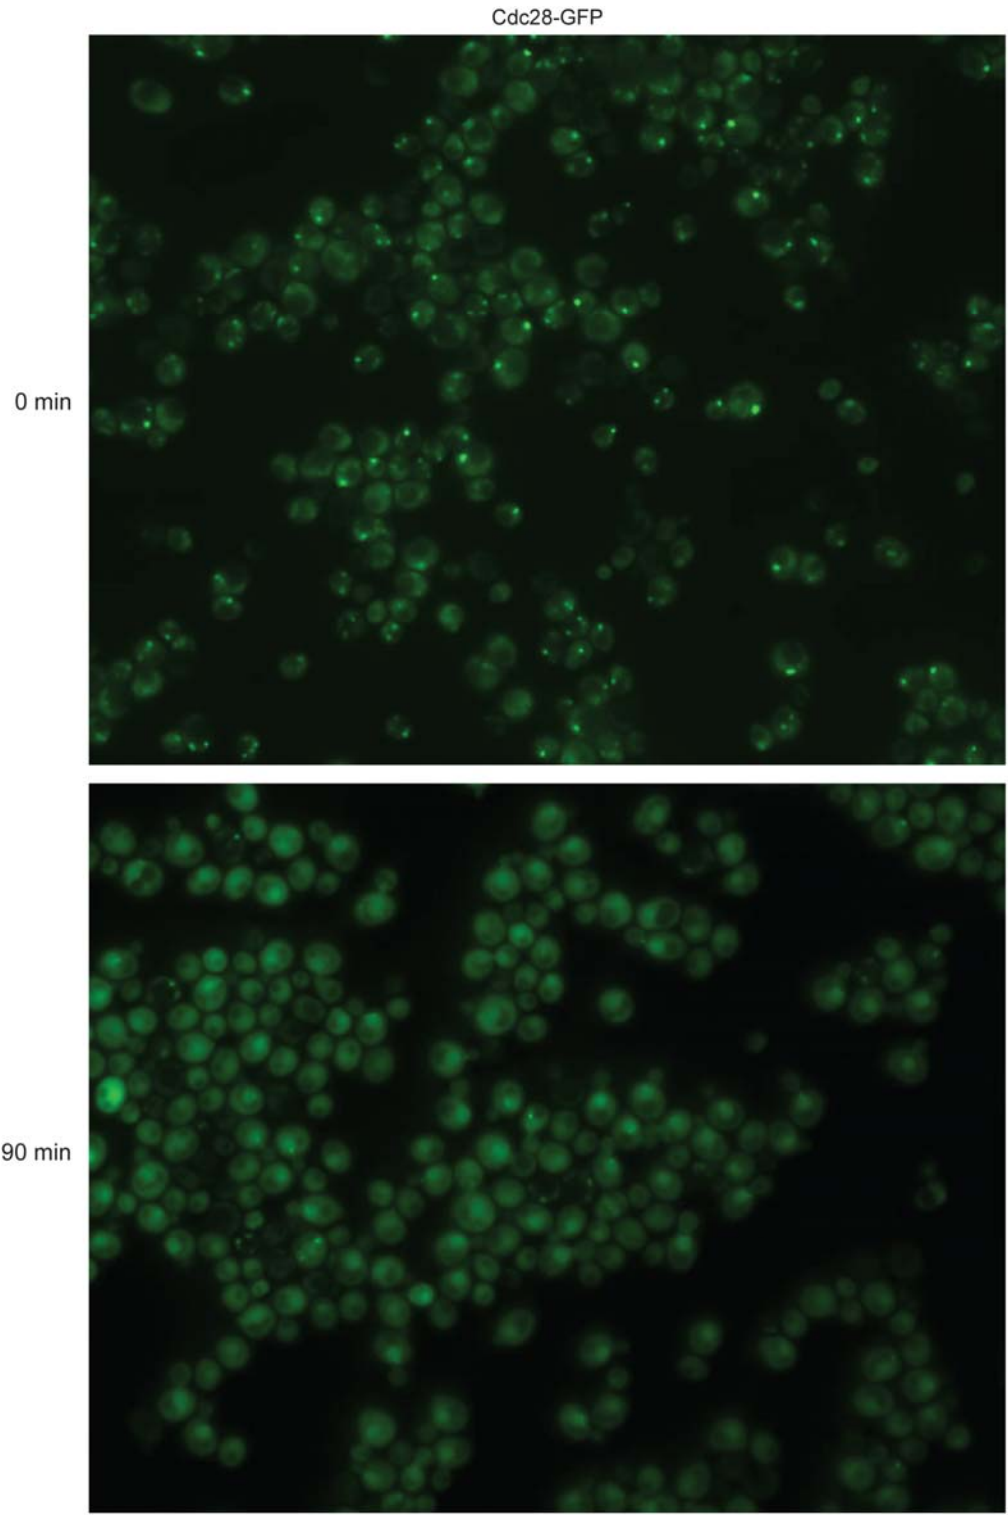

**Figure S4** A larger field of view showing the disassembly of Cdc28-GFP foci that occurs in cells following the addition of fresh medium. The cells expressing the Cdc28-GFP fusion were treated for the indicated times with fresh medium as described in Figure 2.
