# Supplementary material
Source: PubMed Central journal article supplement (PMC4256768)
Supplement: ba212e7f1658b6a1e65abe9ebe000e09_genetics.114.172031-5.pdf [file ba212e7f1658b6a1e65abe9ebe000e09_genetics.114.172031-5.pdf]

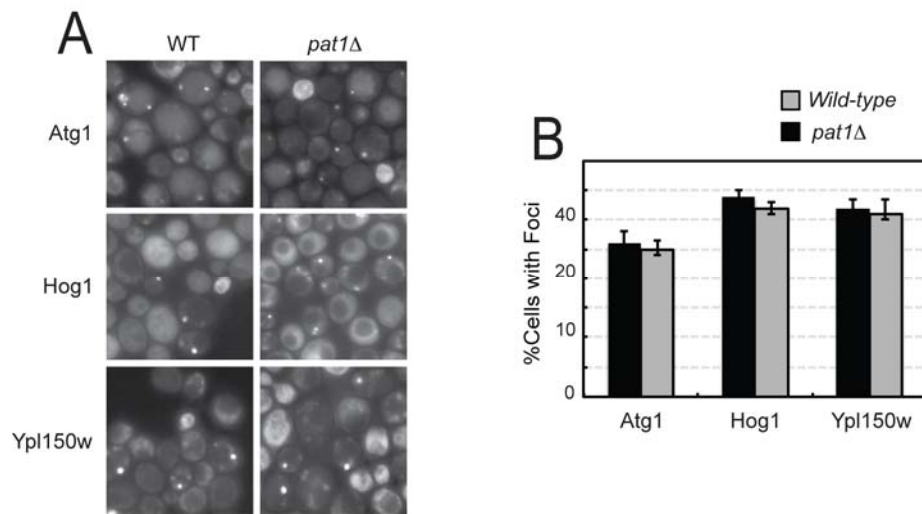

**Figure S7** The loss of Pat1 did not have a significant effect on the frequency of foci formation for the protein kinases, Atg1, Hog1 and Ypl150w.
