# Supplementary material
Source: PubMed Central journal article supplement (PMC4256768)
Supplement: e9905d09c715ddf6e887db6ca675dbba_genetics.114.172031-4.pdf [file e9905d09c715ddf6e887db6ca675dbba_genetics.114.172031-4.pdf]

**Table S1 Plasmids used in this study.**

| PHY Name | Original Name | Relevant details                                                              | Source                  |
|----------|---------------|-------------------------------------------------------------------------------|-------------------------|
| pPHY795  |               | <i>MET3<sub>pro</sub>-RAS2<sup>val19</sup></i> in pRS415 ( <i>CEN, LEU2</i> ) | Lab collection          |
| pPHY796  |               | <i>MET3<sub>pro</sub>-RAS2<sup>val19</sup></i> in pRS416 ( <i>CEN, URA3</i> ) | Lab collection          |
| pPHY921  |               | <i>RAS2<sup>val19</sup></i> in pRS316 ( <i>CEN, URA3</i> )                    | Lab collection          |
| pPHY3660 | pRP1574       | <i>EDC3-mCherry</i> ( <i>CEN, URA3</i> )                                      | Dr. Roy Parker          |
| pPHY3702 | pOE79         | <i>ADH2<sub>pro</sub>-HTB1-mCherry</i> ( <i>LEU2</i> )                        | Dr. James Hopper        |
| pPHY3703 | pHYC49        | <i>ARG3<sub>pro</sub>-GFP</i> in pRS416 ( <i>CEN, URA3</i> )                  | Dr. Anita Hopper        |
| pPHY3704 | pHYC56        | <i>CYS4<sub>pro</sub>-GFP</i> in pRS416 ( <i>CEN, URA3</i> )                  | Dr. Anita Hopper        |
| pPHY3714 |               | <i>DCP2-RFP-PGK1<sub>term</sub></i> in pPRS415 ( <i>CEN, LEU2</i> )           | Dr. Claudio de Virgilio |
| pPHY3754 |               | <i>CDC28-GFP-ADH1<sub>term</sub></i> in pRS413 ( <i>CEN, HIS3</i> )           | This study              |
| pPHY3765 |               | <i>CDC28-mCherry-ADH1<sub>term</sub></i> in pRS413 ( <i>CEN, HIS3</i> )       | This study              |
| pPHY3769 |               | <i>CDC28-GFP-ADH1<sub>term</sub></i> in pRS416 ( <i>CEN, URA3</i> )           | This study              |
| pPHY3782 |               | <i>PBP1-mCherry-ADH1<sub>term</sub></i> in pRS416 ( <i>CEN, URA3</i> )        | This study              |
| pPHY3785 |               | <i>PAT1-mCherry-ADH1<sub>term</sub></i> in pRS416 ( <i>CEN, URA3</i> )        | This study              |
| pPHY3909 |               | <i>PAB1-mCherry-ADH1<sub>ter</sub></i> in pRS416 ( <i>CEN, URA3</i> )         | This study              |
| pPHY3963 |               | <i>ABP1-mCherry-ADH1<sub>term</sub></i> in pRS416 ( <i>CEN, URA3</i> )        | This study              |
| pPHY3964 |               | <i>SCL1-mCherry-ADH1<sub>term</sub></i> in pRS416 ( <i>CEN, URA3</i> )        | This study              |
| pPHY4067 |               | <i>FPK1-mCherry-ADH1<sub>term</sub></i> in pRS416 ( <i>CEN, URA3</i> )        | This study              |
| pPHY4081 |               | <i>KIN28-mCherry-ADH1<sub>term</sub></i> in pRS416 ( <i>CEN, URA3</i> )       | This study              |
| pPHY4083 |               | <i>KSS1-mCherry-ADH1<sub>term</sub></i> in pRS416 ( <i>CEN, URA3</i> )        | This study              |

**Table S2** is available for download as an Excel file at <http://www.genetics.org/lookup/suppl/doi:10.1534/genetics.114.172031/-/DC1>
