# Supplementary material
Source: PubMed Central journal article supplement (PMC4256768)
Supplement: ffe8d697bb85777db8f74e0f7ee4eade_genetics.114.172031-7.pdf [file ffe8d697bb85777db8f74e0f7ee4eade_genetics.114.172031-7.pdf]

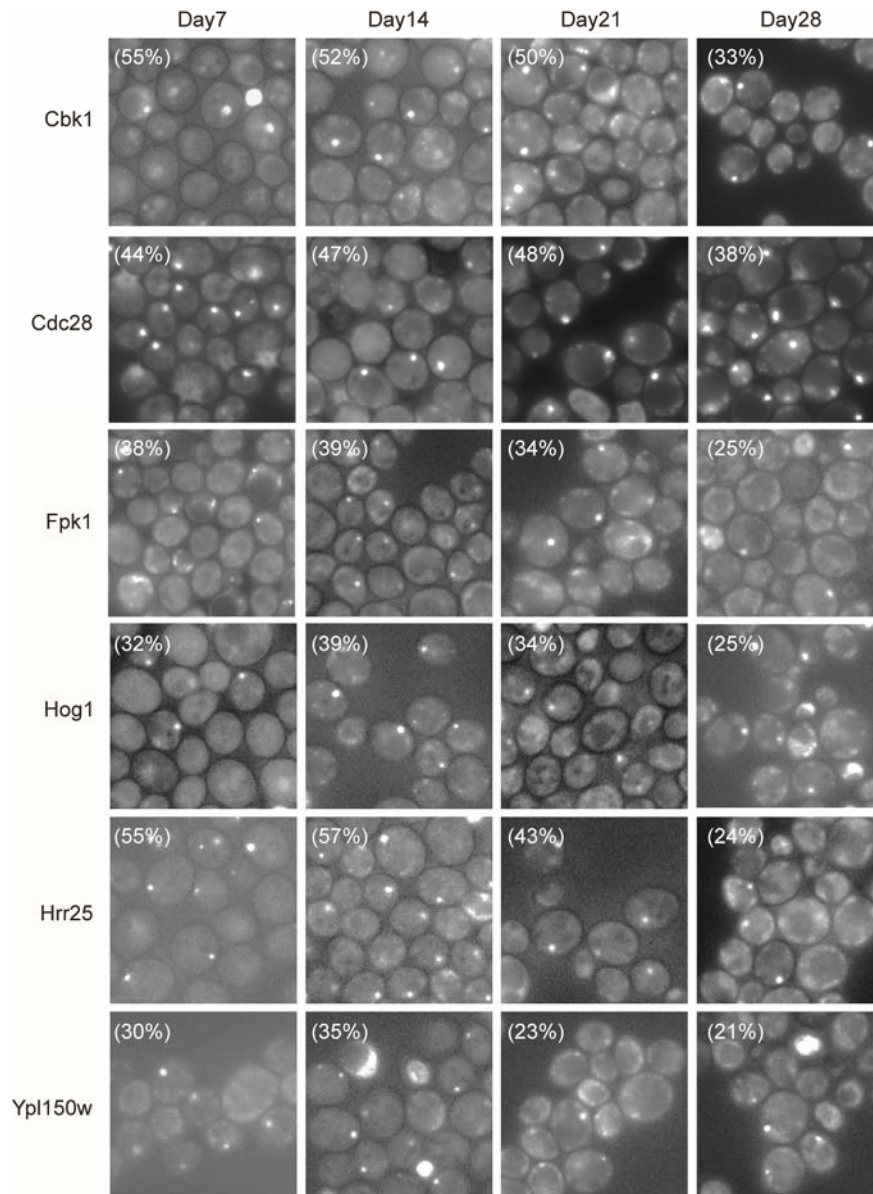

**Figure S2** The protein kinase foci persisted throughout the stationary phase of growth. Cells expressing six representative protein kinase-GFP fusions were examined by fluorescence microscopy at the indicated days of growth in rich medium.
